# Supplementary material
Source: HighWire-hosted journal article supplement (https://bmjopen.bmj.com/content/14/8/e085247)

**Supplemental File 1.** Exploration of effect modification and confounders of the association between wait time for surgery and COVID-19 wave

| Log Wait Time                               | Coefficient | Standard Error | t      | P>t   | Low 95% CI | High 95%CI |
|---------------------------------------------|-------------|----------------|--------|-------|------------|------------|
| COVID-19 Wave<br>(reference = Pre-COVID-19) |             |                |        |       |            |            |
| Wave1                                       | -0.058      | 0.008          | -7.14  | 0     | -0.074     | -0.042     |
| Wave2                                       | -0.169      | 0.010          | -16.18 | 0     | -0.190     | -0.149     |
| Wave3                                       | -0.188      | 0.015          | -12.67 | 0     | -0.218     | -0.159     |
| Wave4                                       | -0.221      | 0.019          | -11.77 | 0     | -0.258     | -0.184     |
| Age<br>(reference = <50 years old)          |             |                |        |       |            |            |
| 50-65                                       | -0.0048196  | 0.0058385      | -0.83  | 0.409 | -0.016263  | 0.0066237  |
| 65-75                                       | 0.0142696   | 0.0066162      | 2.16   | 0.031 | 0.001302   | 0.0272372  |
| 75+                                         | -0.0309092  | 0.0077165      | -4.01  | 0     | -0.0460332 | -0.0157851 |
| Gender<br>M:F                               |             |                |        |       |            |            |
|                                             | -0.0861889  | 0.0045906      | -18.78 | 0     | -0.0951863 | -0.0771915 |
| Zone<br>(reference = Calgary)               |             |                |        |       |            |            |
| Central                                     | -0.6249261  | 0.0076977      | -81.18 | 0     | -0.6400134 | -0.6098389 |
| Edmonton                                    | -0.3732695  | 0.0090215      | -41.38 | 0     | -0.3909514 | -0.3555876 |
| North                                       | -0.7868349  | 0.0124859      | -63.02 | 0     | -0.811307  | -0.7623628 |
| South                                       | -0.7535116  | 0.0140913      | -53.47 | 0     | -0.7811301 | -0.7258931 |
| Charlson Comorbidity Index                  |             |                |        |       |            |            |

| (reference = 0)                       |            |           |        |       |            |            |
|---------------------------------------|------------|-----------|--------|-------|------------|------------|
| 1                                     | 0.0118304  | 0.0105078 | 1.13   | 0.26  | -0.0087646 | 0.0324254  |
| 2+                                    | 0.0488201  | 0.0105467 | 4.63   | 0     | 0.0281488  | 0.0694914  |
| Cancer<br>Yes:No                      | -0.8282498 | 0.0139614 | -59.32 | 0     | -0.8556138 | -0.8008858 |
| Surgery Type<br>(reference = general) |            |           |        |       |            |            |
| Cardiovascular,<br>Thoracic, Vascular | -0.6314477 | 0.0147283 | -42.87 | 0     | -0.6603148 | -0.6025805 |
| Dentistry, Oral, and<br>Maxillofacial | 0.6695815  | 0.0347453 | 19.27  | 0     | 0.6014816  | 0.7376814  |
| Neurology                             | -0.2411196 | 0.0190093 | -12.68 | 0     | -0.2783773 | -0.203862  |
| Obstetrics/Gynecology,<br>Urology     | -0.0119478 | 0.0085851 | -1.39  | 0.164 | -0.0287744 | 0.0048787  |
| Ophthalmology                         | 0.7980703  | 0.0103669 | 76.98  | 0     | 0.7777514  | 0.8183891  |
| Orthopedic                            | 0.5595651  | 0.0108891 | 51.39  | 0     | 0.5382228  | 0.5809075  |
| Otolaryngology                        | 0.5137149  | 0.0149298 | 34.41  | 0     | 0.484453   | 0.5429769  |
| Transplant/other                      | -0.7120727 | 0.0523426 | -13.6  | 0     | -0.8146627 | -0.6094826 |
| Plastics                              | -0.0615105 | 0.0165402 | -3.72  | 0     | -0.0939288 | -0.0290921 |
| Interaction Terms                     |            |           |        |       |            |            |
| grpci_i                               | -0.0258706 | 0.0020215 | -12.8  | 0     | -0.0298327 | -0.0219084 |
| zone_i                                | 0.0051867  | 0.0012885 | 4.03   | 0     | 0.0026613  | 0.0077121  |
| surgery_i                             | -0.0107503 | 0.000613  | -17.54 | 0     | -0.0119519 | -0.0095488 |
| cancer_i                              | 0.0602512  | 0.0048066 | 12.54  | 0     | 0.0508304  | 0.069672   |
| _cons                                 | 5.064972   | 0.0108946 | 464.91 | 0     | 5.043619   | 5.086325   |

Note: Convergence not achieved for quantile regression. Log transformed linear regression used as an alternative

Surgery median wait time by age, gender and COVID waves

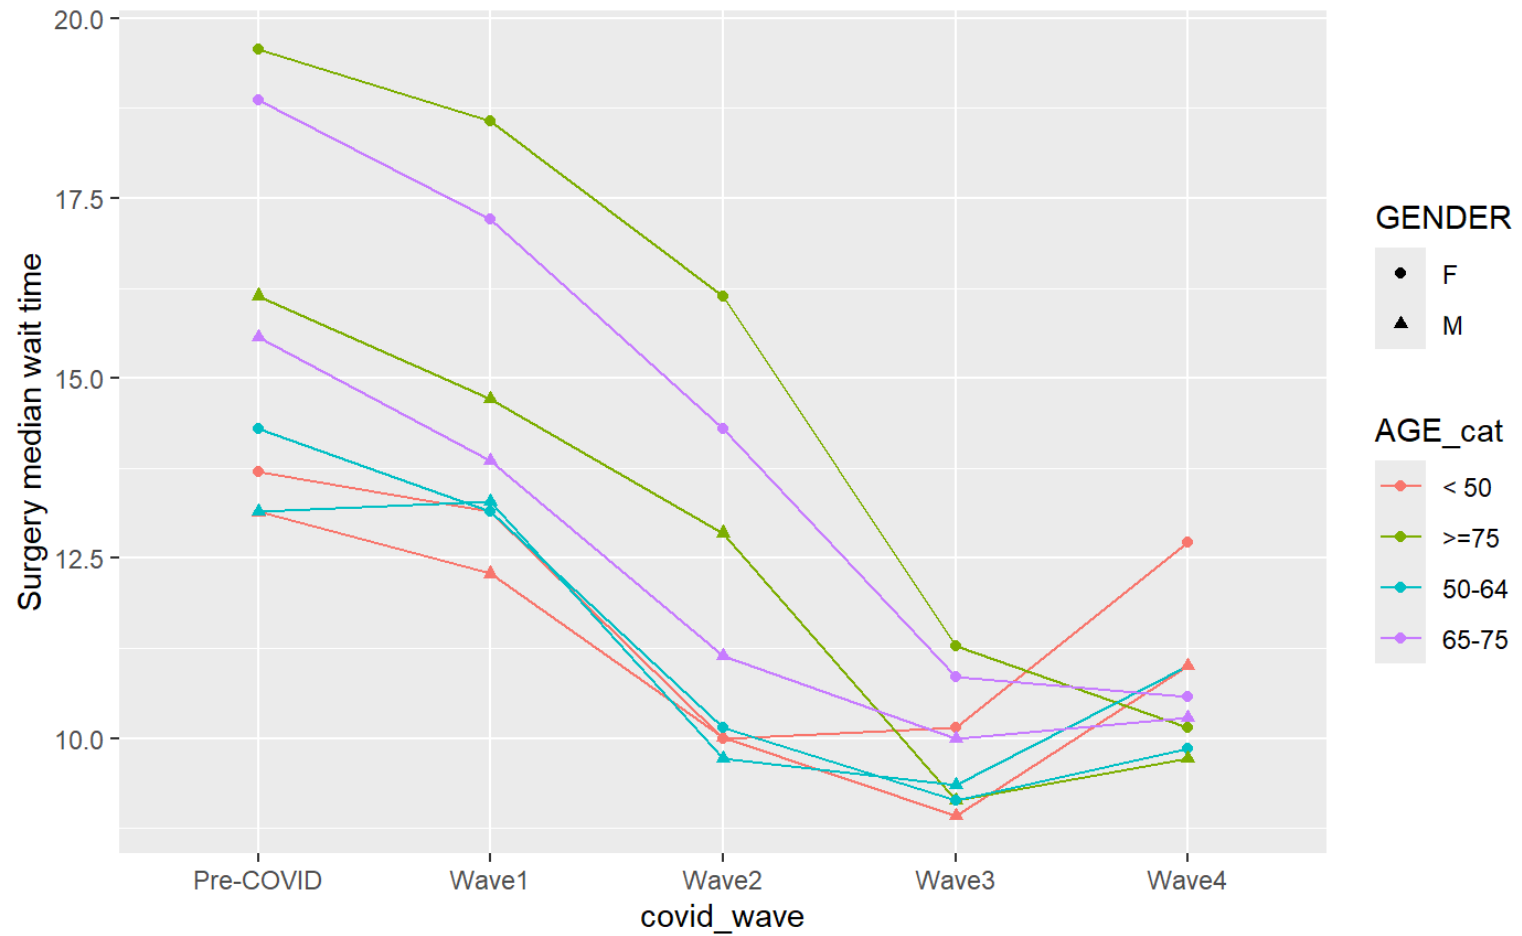

Surgery median wait time by gender and COVID waves

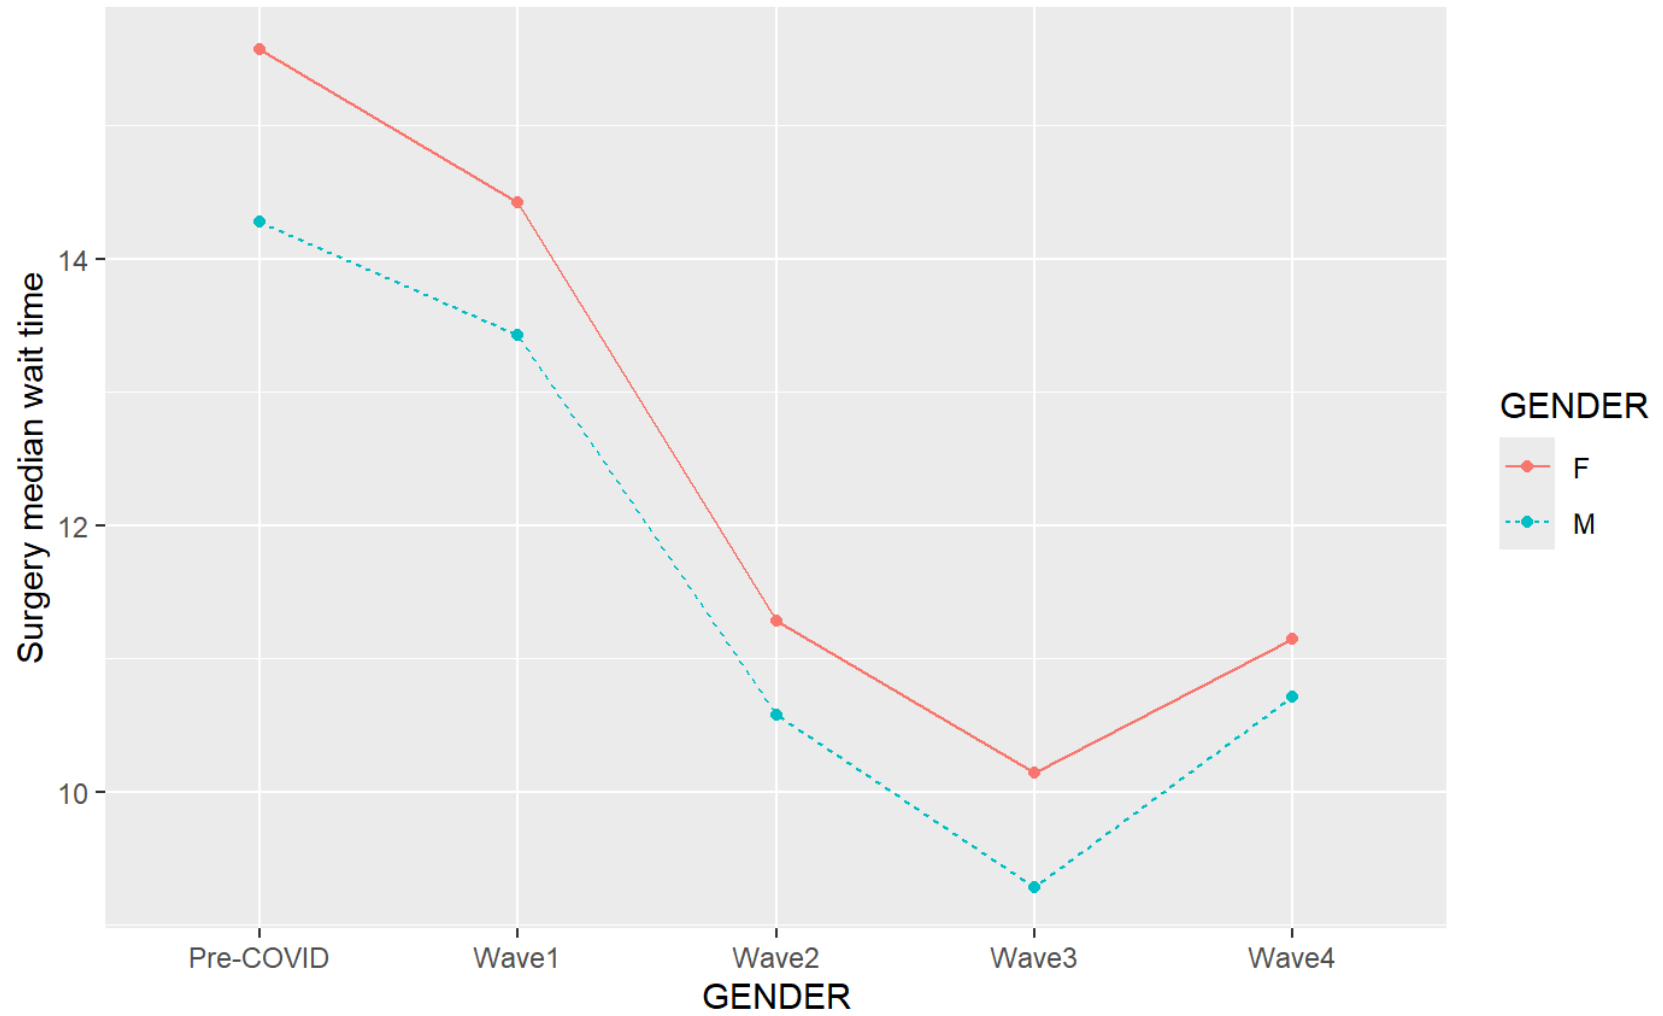

Surgery median wait time by age category and COVID waves

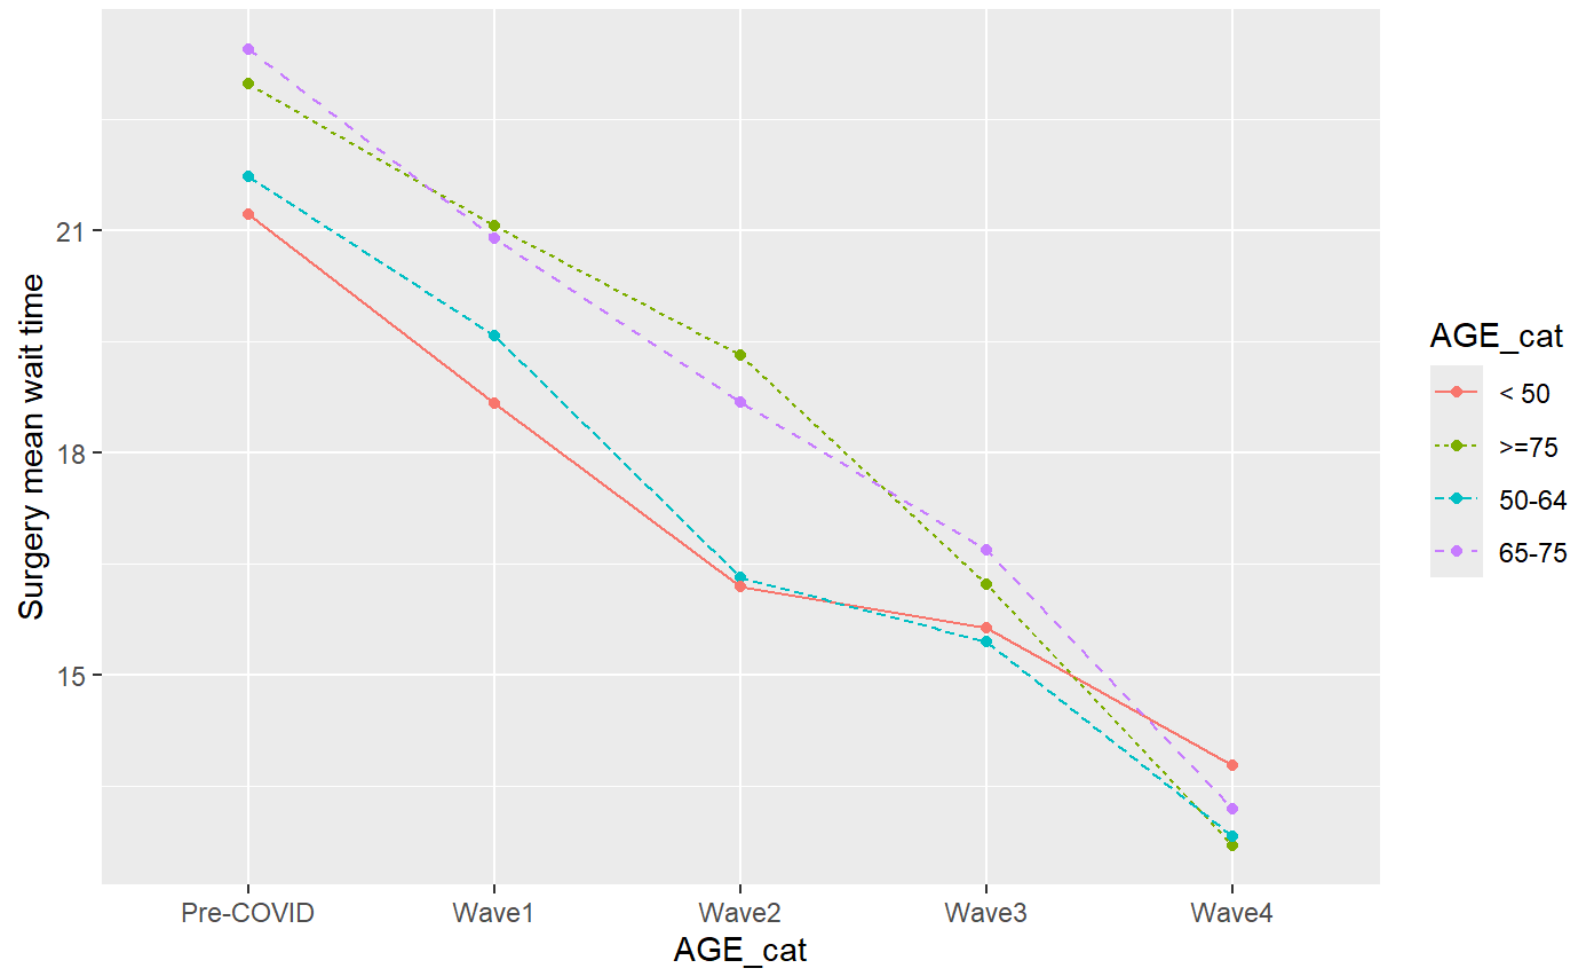

Surgery median wait time by surgery type and COVID waves

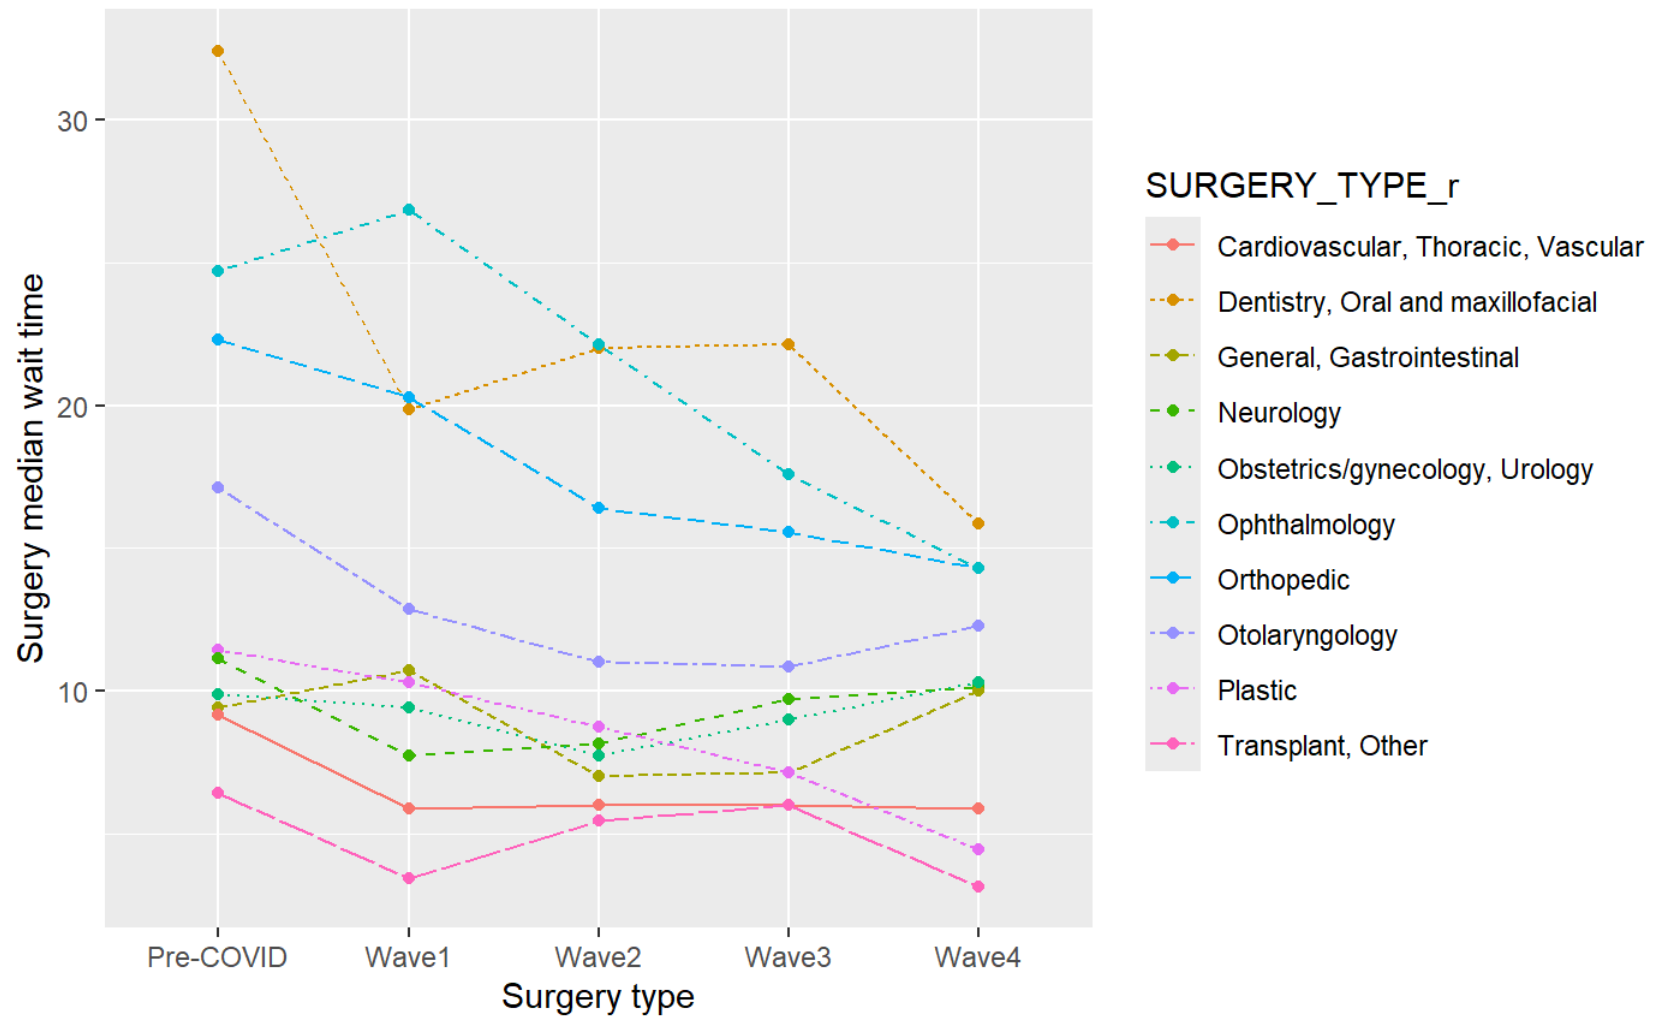

Surgery median wait time by Charlson comorbidity index and COVID waves

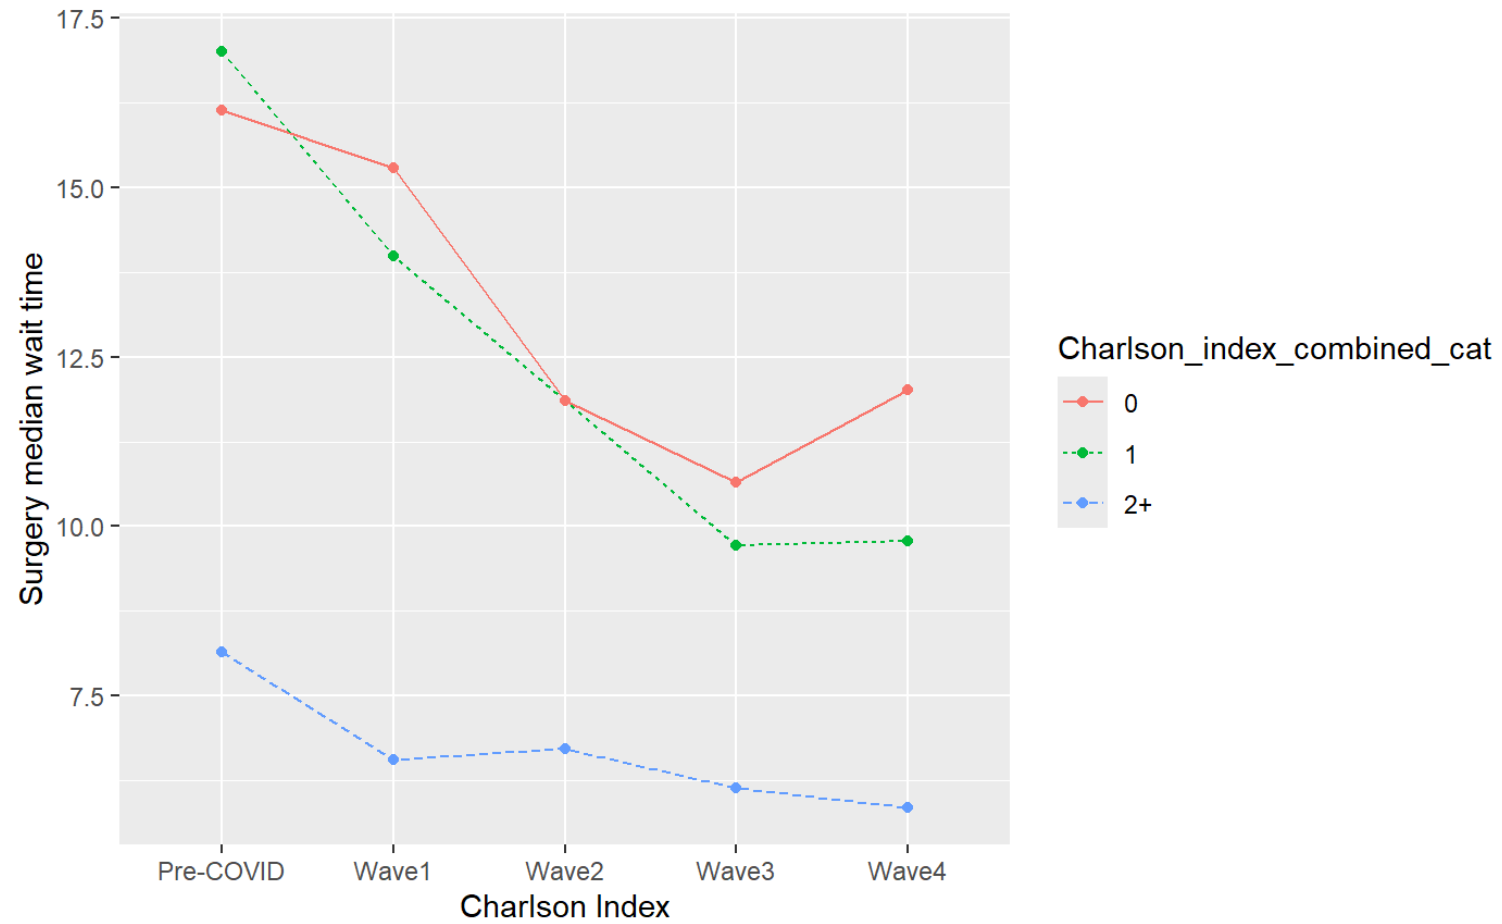

Surgery median wait time by cancer surgery and COVID waves

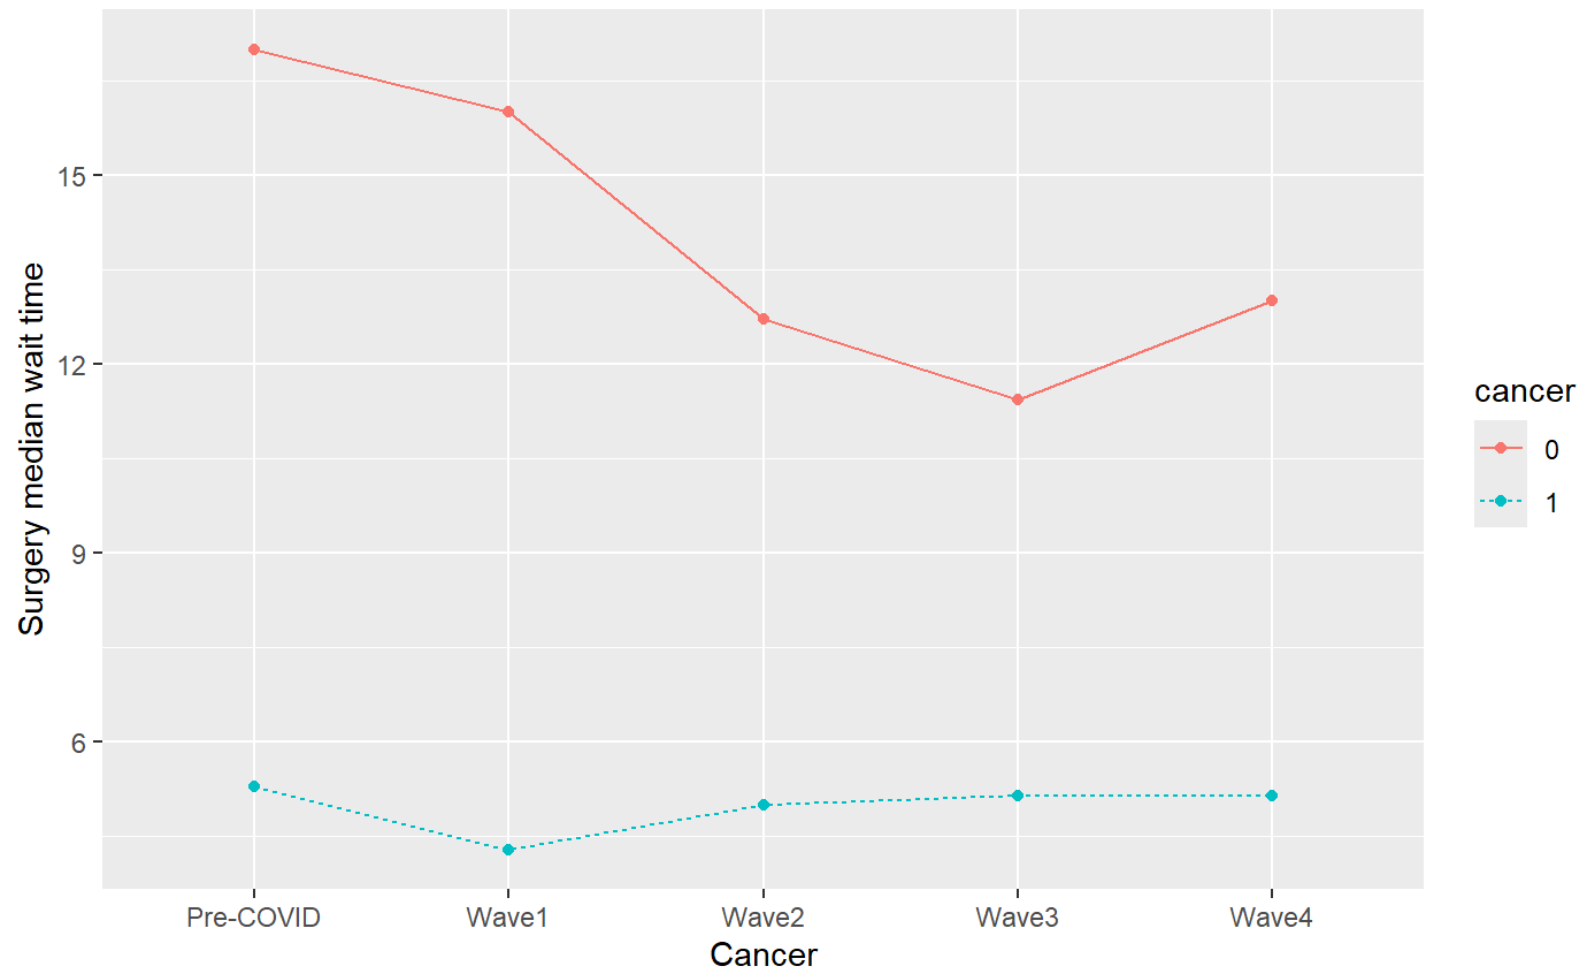

Surgery median wait time by surgery type, health zone and COVID waves



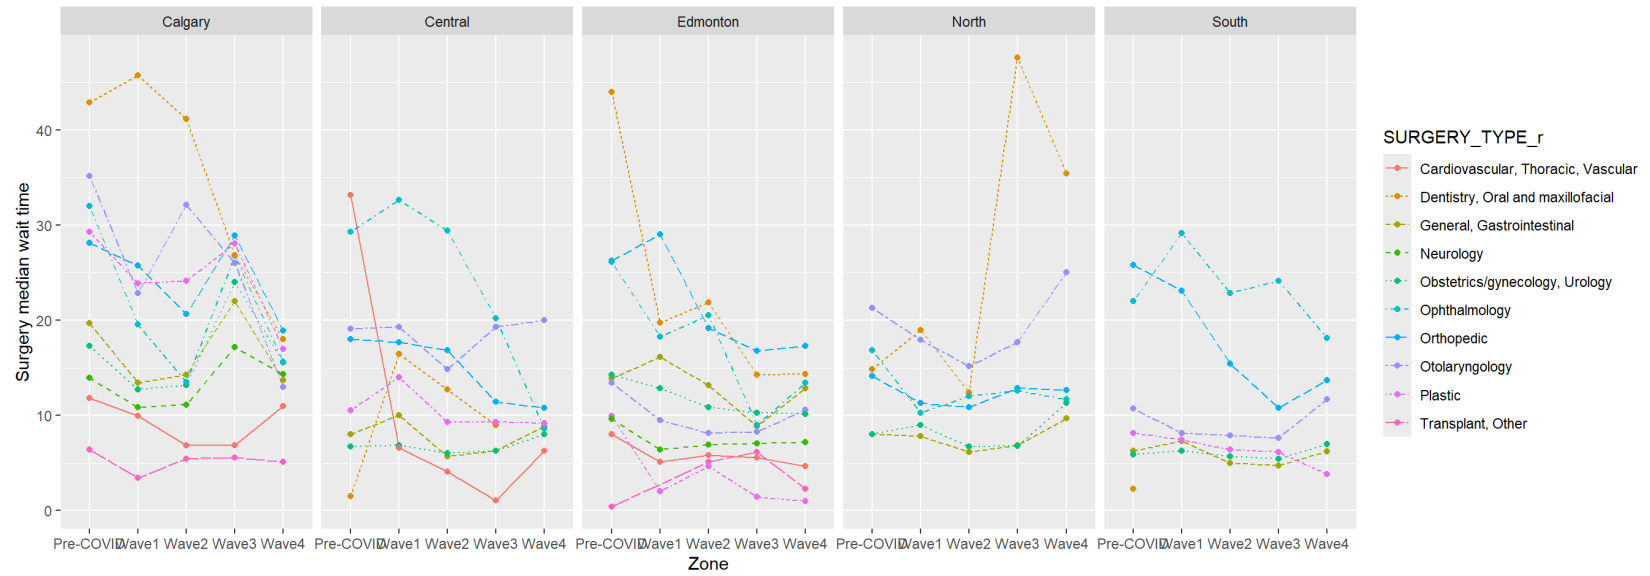

Supplement: inline-supplementary-material-1 [file inline-supplementary-material-1.pdf]
